# Supplementary material for: A ‘Frugal’ EGFET Sensor for Waterborne H2S
Source: MDPI journal article supplement (doi:10.3390/s24020407), 2024-01-09
Supplement: s1 [file s1]

# Supplementary Material

## S1 Local Water Analysis Results

**Table S1:** Analysis of local tap water carried out by the laboratories of the ‘Water Technologies Innovation Institute & Research Advancement in Saline Water Conversion Corporation (SWCC)’ [37].

| Parameter                     | Unit                    | Result |
|-------------------------------|-------------------------|--------|
| pH                            | -                       | 8.3    |
| Conductivity                  | $\mu\text{S}/\text{cm}$ | 235    |
| TDS                           | $\text{mg}/\text{L}$    | 122    |
| R-Cl <sub>2</sub>             | $\text{mg}/\text{L}$    | 0.07   |
| Alkalinity                    | $\text{mg}/\text{L}$    | 32     |
| Hardness                      | $\text{mg}/\text{L}$    | 40     |
| HCO <sub>3</sub> <sup>-</sup> | $\text{mg}/\text{l}$    | 39     |
| Na <sup>+</sup>               | $\text{mg}/\text{L}$    | 16     |
| Ca <sup>2+</sup>              | $\text{mg}/\text{L}$    | 15     |
| Mg <sup>2+</sup>              | $\text{mg}/\text{L}$    | 2      |
| Cl <sup>-</sup>               | $\text{mg}/\text{L}$    | 27     |
| SO <sub>4</sub> <sup>-</sup>  | $\text{mg}/\text{L}$    | 8      |

## S2 EGFET response saturation at high H<sub>2</sub>S concentration

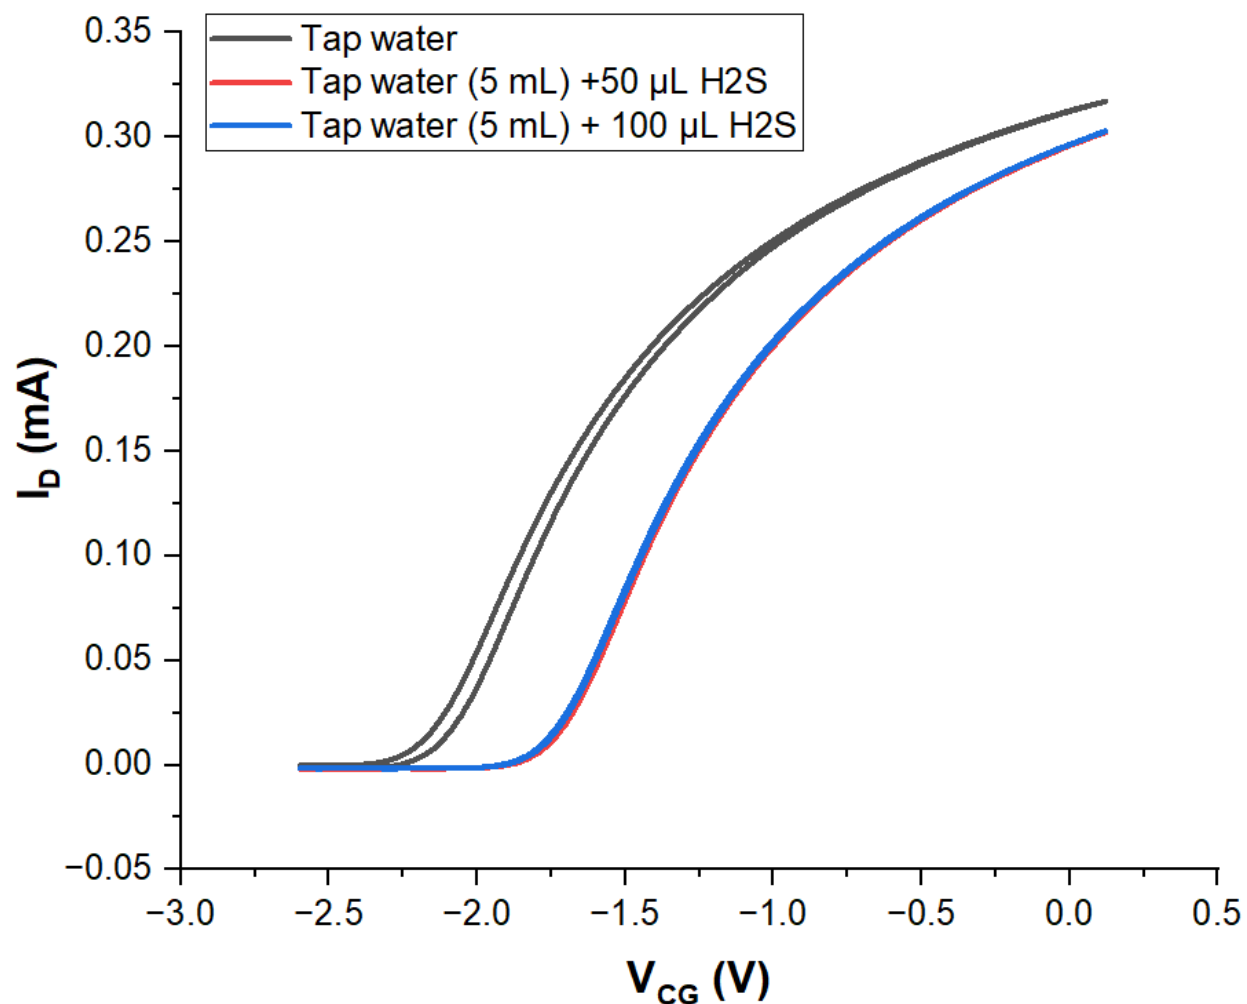

**Figure S1.** Comparison of transfers in an EGFET with 5 mL EDL pool filled with tap water, after adding 50  $\mu$ L, and after adding  $2 \times 50 \mu\text{L} = 100 \mu\text{L}$  of H<sub>2</sub>S stock solution at  $c_{\text{stock}} = 117 \text{ mM}$ . CG was zinc, FG was gold.

Figure S1 shows that increasing H<sub>2</sub>S concentration in the EDL pool from  $0 \rightarrow 1.16 \text{ mM}$  leads to a large shift along the  $V_G$  axis, but a further increase from  $1.16 \text{ mM} \rightarrow 2.31 \text{ mM}$  does not lead to a further shift. We conclude that the EGFET response has saturated at  $1.16 \text{ mM}$  or below.

### S3 Absence of EGFET response to pH

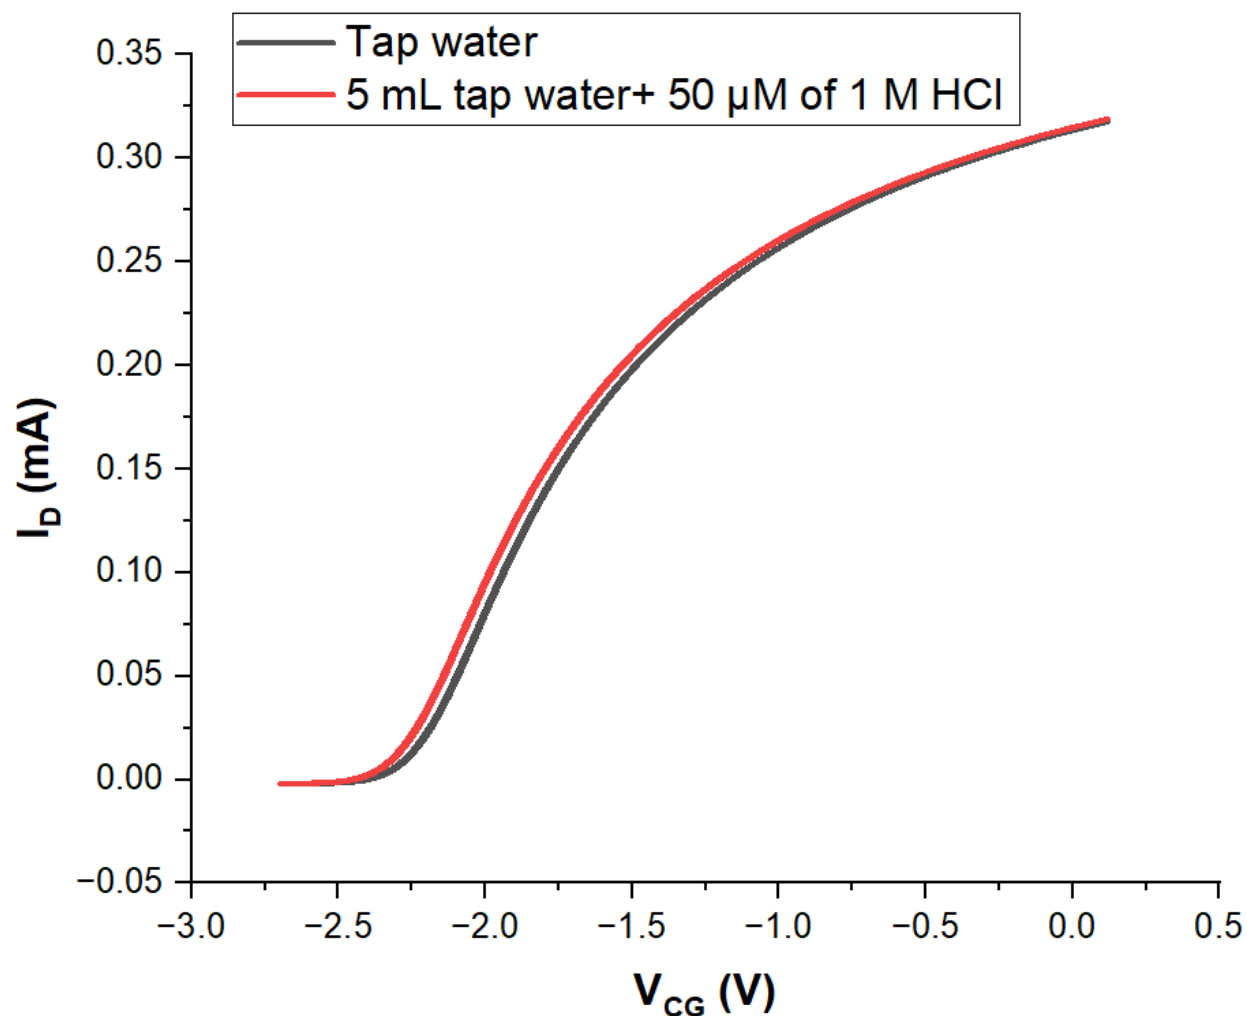

**Figure S2.** Comparison of transfers in an EGFET with 5 mL EDL pool filled with tap water (black), and after adding 50  $\mu$ L of 1 M HCl (red). This turns the water in the pool into 10 mM HCl and as a strong acid like HCl fully dissociates, pH drops from 7 (water) to 2 (10 mM HCl) However, the transfer characteristics are very similar before and after the addition of HCl, our EGFET does not respond to pH.

#### S4 Persistence of H<sub>2</sub>S on Au surface

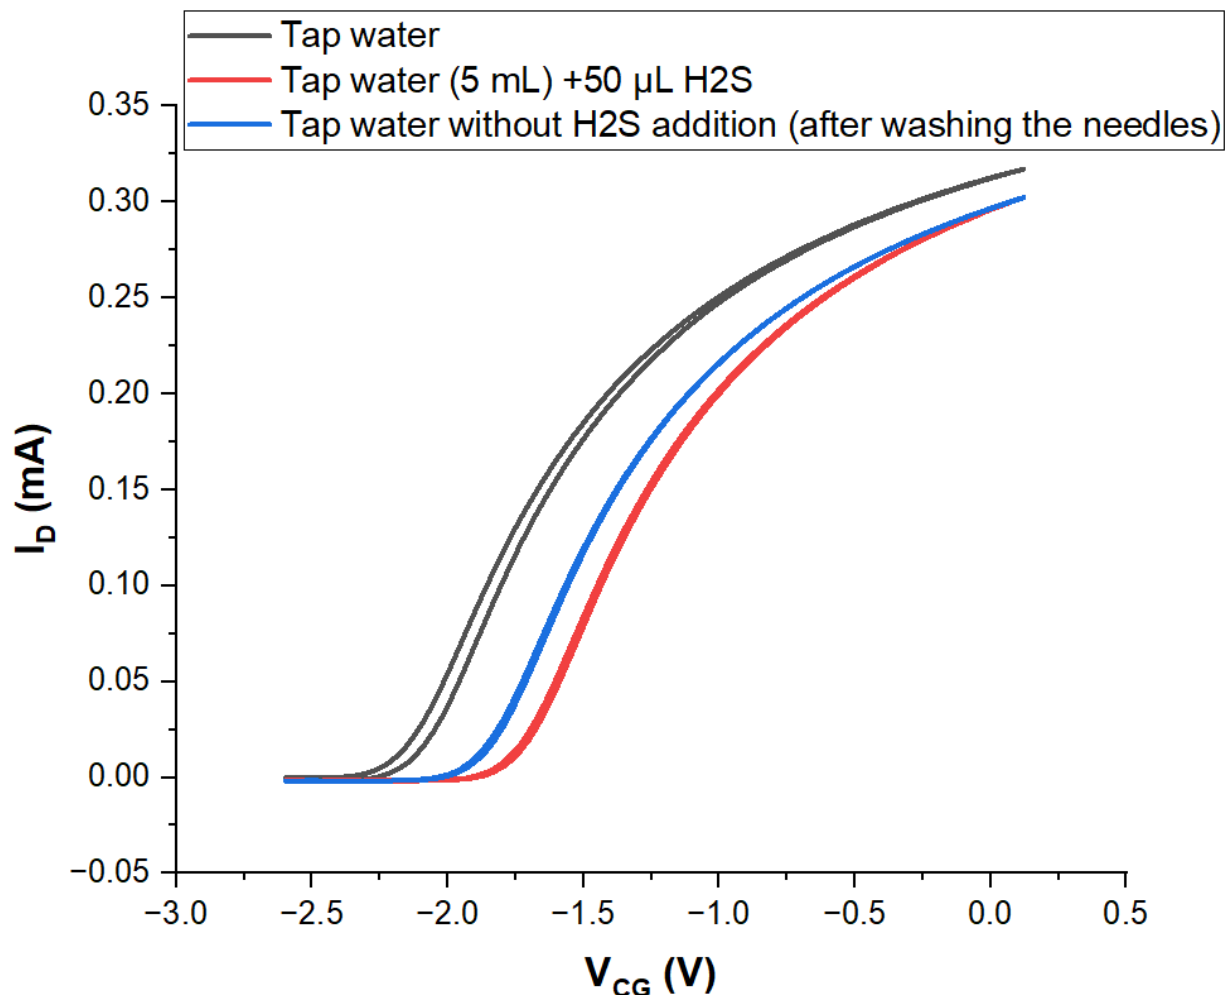

**Figure S3.** Comparison of transfers in an EGFET with 5 mL EDL pool filled with tap water, after the addition of 50  $\mu$ L H<sub>2</sub>S stock solution at  $c_{stock} = 117$  mM, and after washing and re-using the same Au electrode in another EDL pool filled with tap water again, without H<sub>2</sub>S addition. CG was zinc, FG was gold

Figure S3 shows that an Au electrode that was once exposed to H<sub>2</sub>S retains a  $V_{GG}$  shift even after it is removed from the H<sub>2</sub>S solution, washed in water, and then immersed into a new pool filled with fresh tap water / without H<sub>2</sub>S. We conclude that H<sub>2</sub>S remains adsorbed onto an Au surface even when the surface is removed from the H<sub>2</sub>S solution and washed. Electrodes cannot be re-used without further measures.

## S5 Recovering used electrodes

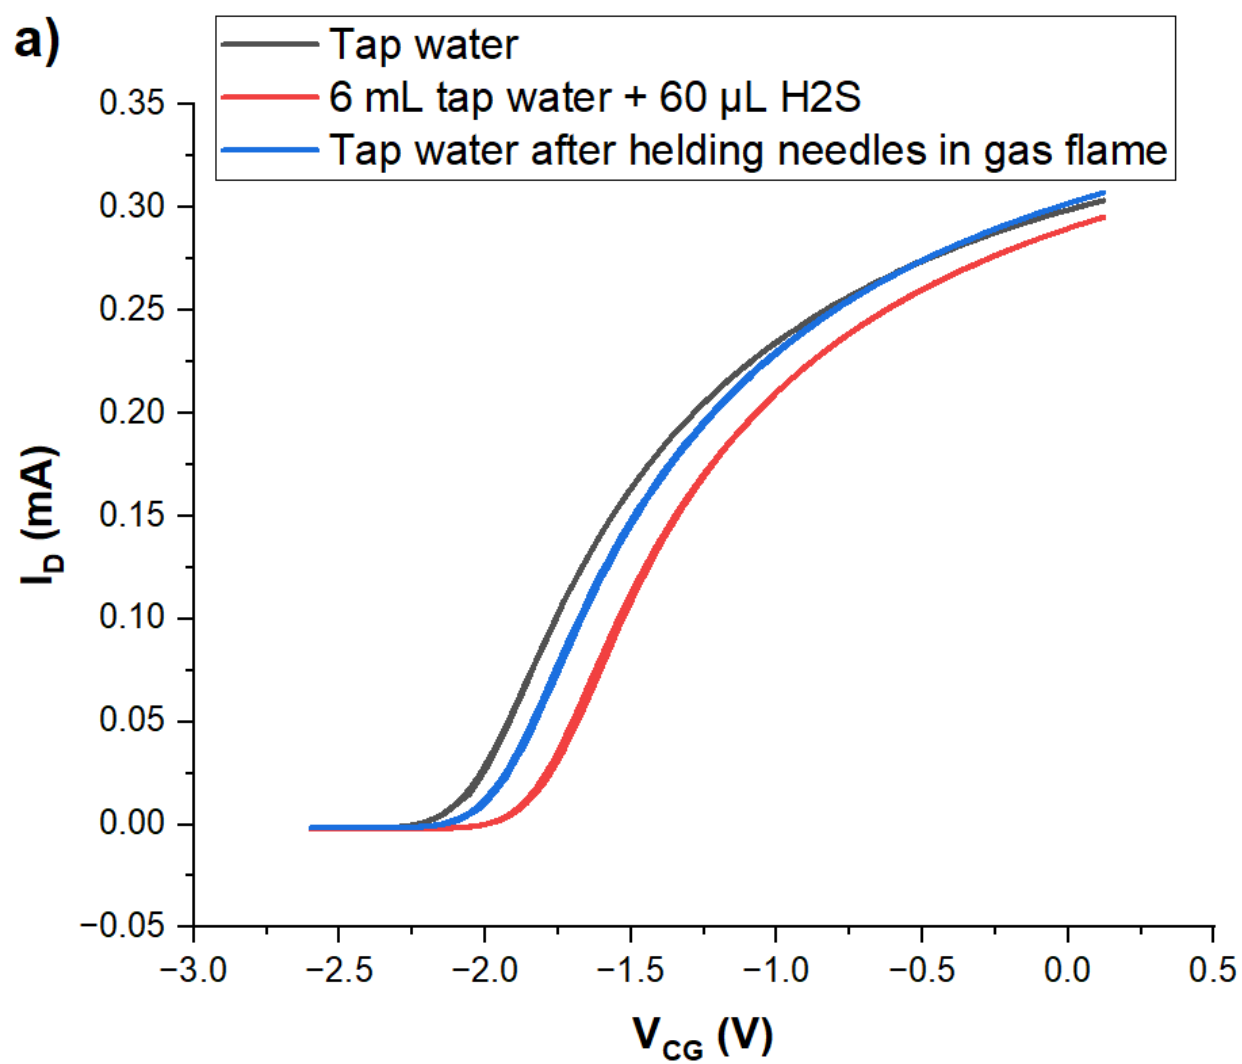

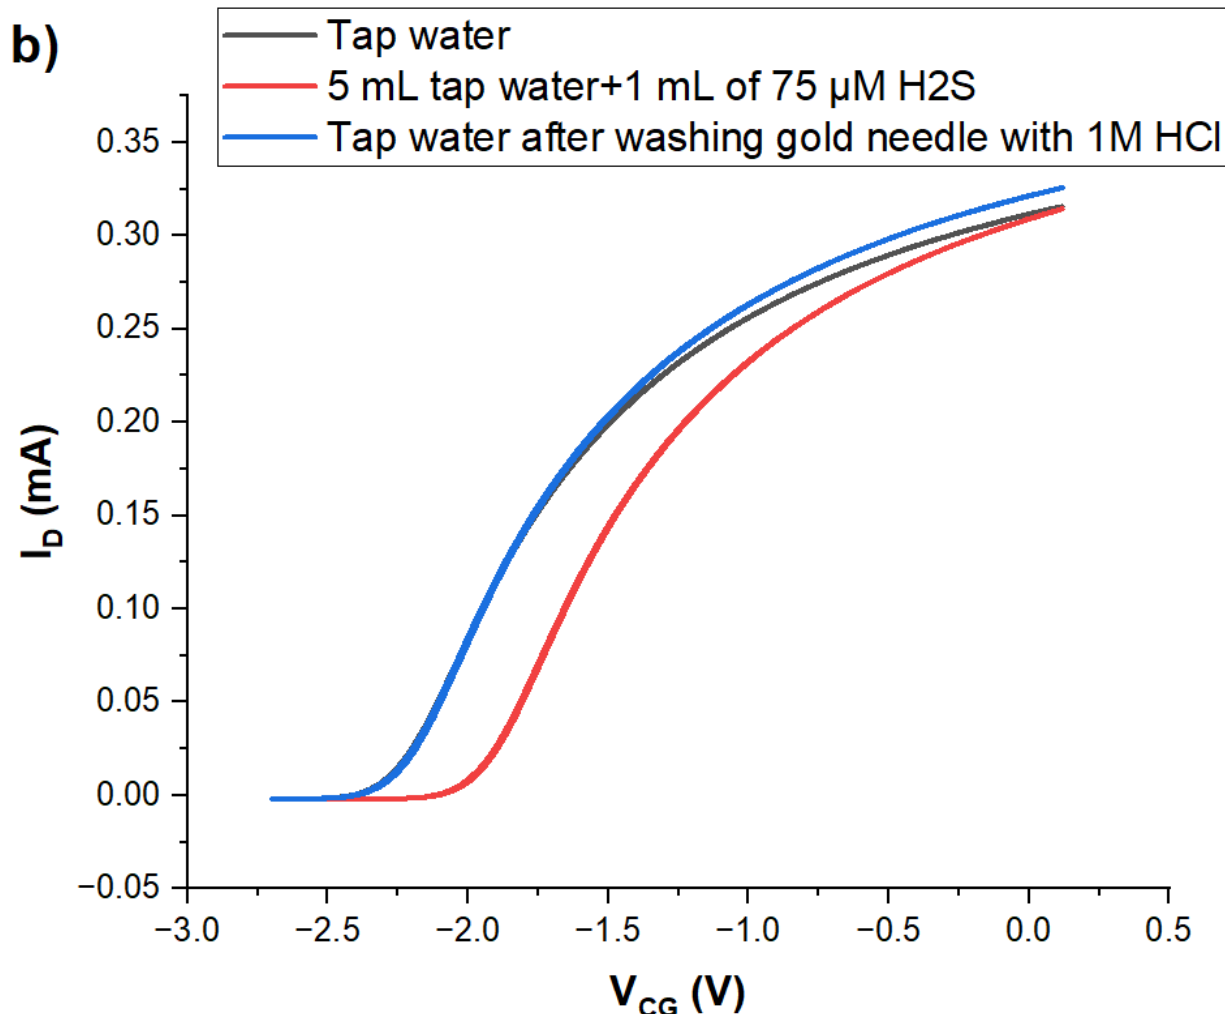

**Figure S4.** Comparison of transfers in an EGFET with 6 mL EDL pool filled with tap water (black), after the addition of 60  $\mu$ L H<sub>2</sub>S stock solution at  $c_{\text{stock}} = 117$  mM (red), and after different attempts at recovering the initial performance in tap water (without H<sub>2</sub>S) again (blue). CG was zinc, and FG was gold. **a)** ‘firing’ an exposed needle in a gas flame, and re-using the same Au electrode in another EDL pool filled with tap water again, without H<sub>2</sub>S addition. **b)** washing an exposed needle in 1M HCl.

Figure S4a shows that an Au electrode that was once exposed to H<sub>2</sub>S but then removed from the solution, dried, and held into a gas flame does partly recover when re-used in a new pool that contains only ‘clean’ tap water without added H<sub>2</sub>S. However, the electrode retains a small  $V_{GG}$  shift compared to its pristine state. However, washing a used needle in 1M HCl does completely recover the original transfer.

### S6 Limit-of-detection (LoD)

The limit-of-detection (LoD) of our EGFET sensor can be evaluated from the response characteristic shown in Figure 5, with the help of the fit parameters in Table 3 for the fit of Figure 5 to Equation (3). The data in Figure 5 are first re-plotted in linearised form,  $((k c_{\text{pool}})^{\beta} + 1) \Delta V_{\text{CG}}$  vs.  $(k c_{\text{pool}})^{\beta}$ , Figure S5.

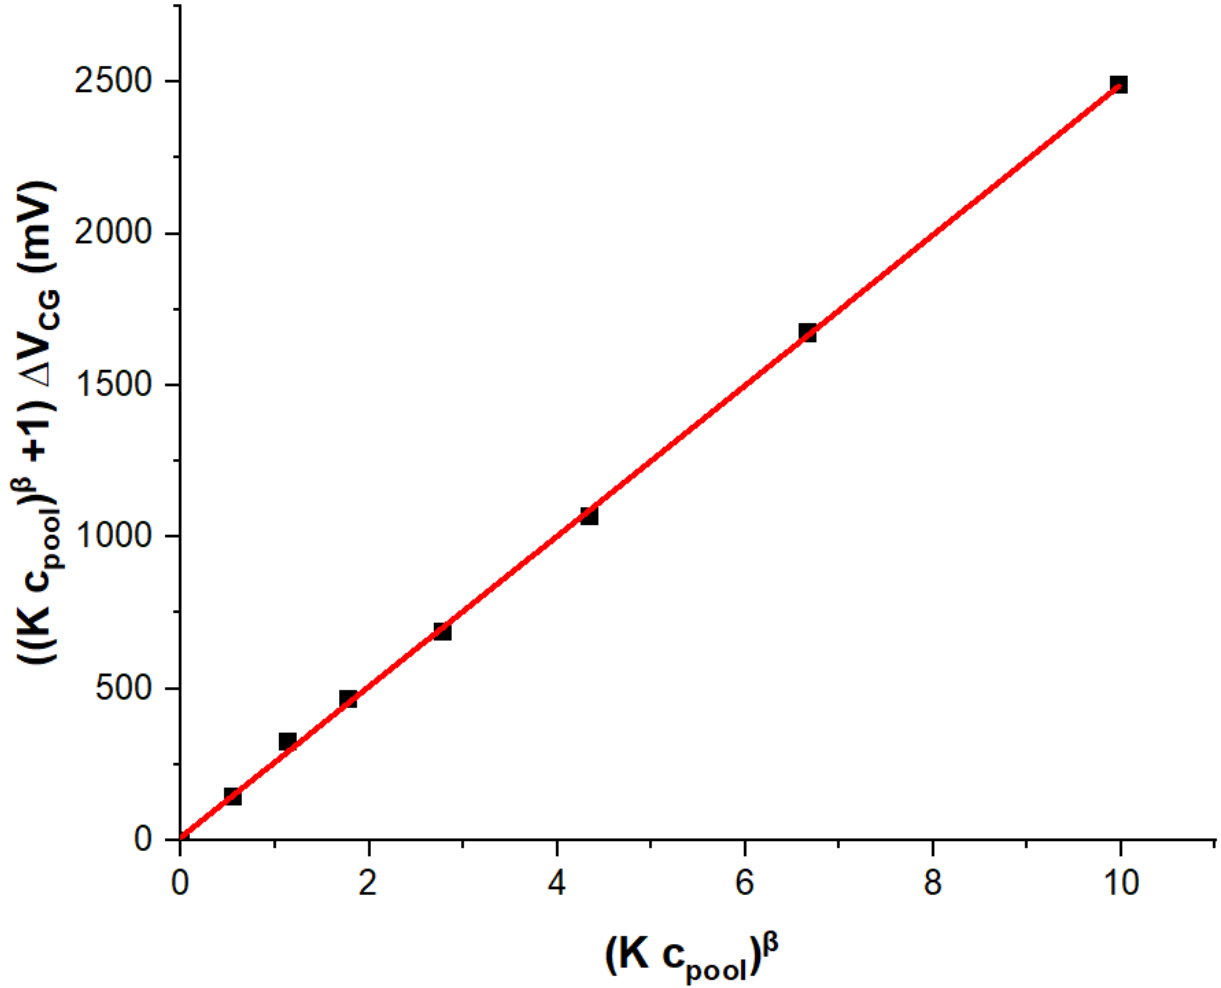

**Figure S5.** Linearised plot of the data in Figure 5,  $((k c_{\text{pool}})^{\beta} + 1) \Delta V_{\text{CG}}$  vs.  $(k c_{\text{pool}})^{\beta}$  using the parameters  $k$  and  $\beta$  listed in Table 3. Also shown in red is a fitted straight line.

A straight line of the form Equation (S1) is fitted to the linearised plot:

$$((k c_{\text{pool}})^{\beta} + 1) \Delta V_{\text{CG}} = m(k c_{\text{pool}})^{\beta} + b \quad (\text{S1})$$

With slope  $m$  and intercept  $b$ . We find fit parameters  $m \pm \Delta m = (248.1 \pm 2.1) \text{ mV}$  and  $b \pm \Delta b = (11.9 \pm 9.8) \text{ mV}$  with  $\Delta m$  and  $\Delta b$  the 'estimated standard errors' (e.s.e's) of  $m$  and  $b$ .  $\Delta b$  is similar in magnitude to  $b$  itself, which is consistent with the expectation  $b = 0$ . LoD is calculated with the commonly used '3 errors' criterion,

$$(k_{\text{CLoD}})^{\beta} = 3\Delta b/m \quad (\text{S2})$$

We find  $k_{\text{CLoD}} = 14.9 \text{ nM}$
